# Supplementary material
Source: Research Square preprint supplement (doi:10.21203/rs.3.rs-9234243/v1)
Supplement: Supplementary file 1 [file 593e492493fe50032e62b366.docx]

**Multicolor Carbon Dots with Purple-to-Red Emission for Fluorescent Inks and LEDs Applications**

**Yaoyao Liu,a Yi Jing,a Luqing Zhao,a Yuxin Song,a Ying Peng,a Qian Wang,a Zheng Yang,a,b,* Xiaodan Jia,a,b and Xiangrong Liua,b**

*a College of Chemistry and Chemical Engineering, Xi’an University of Science and Technology, Xi’an 710054, P. R. China.*

*b Key Laboratory of Coal Resources Exploration and Comprehensive Utilization, Ministry of Land and Resources, Xi’an 710012, P. R. China.*

*Corresponding author: yangzheng@xust.edu.cn; orcid.org/0000-0002-1554-4794

**CONTENTS**

[1. Experimental section. 3](#_Toc27771)

[1.1 General methods 3](#_Toc8161)

[1.2 Synthesis of the CDs 3](#_Toc6909)

[1.3 Preparation of fluorescent ink 4](#_Toc26031)

[1.4 Making LED. 4](#_Toc7609)

[2. Optical properties of the CDs. 5](#_Toc2218)

[3. Equations 18](#_Toc15449)

[3.1 Equations for calculation of fluorescence lifetime 18](#_Toc31418)

[3.2 Equations for calculation of quantum yield 18](#_Toc20094)

# 1. Experimental section.

## 1.1 General methods

The fluorescent spectra were performed on the Horiba FluoroMax–4 fluorescence spectrophotometer. Absorbance spectra were recorded on the Hitachi U–2900 spectrophotometer. Fluorescent decays were obtained on an Edinburgh FLSP920 steady/transient fluorescence spectrometer. Transmission electron microscope images were performed from a JEM–1400 Flash analyzer. Raman spectra were measured with ThermoFisher DXR 2 spectroscopy. X–ray photoelectron spectroscopy spectra were conducted on a ULVAC–PHI PHI5000VersaProbeIII spectrophotometer with the excitation source of Al Ka. X–Ray powder diffraction spectroscopy analyses were recorded on the Bruker D8 Advance analyzer. IR spectra were performed on a Bruker Tensor 27 spectrometer. The LED performance testing was conducted using the HPCS-6300 fast spectral analyzer.

Citric acid, 3-hydroxy-N, N-diethylaniline, o-phenylenediamine and polyvinyl pyrrolidone were obtained from *Inno– Chem Co., LTD.* (Beijing, China). All other reagents, including various metallic compounds were purchased from *Daosheng Biochemical Science and Trade Co., LTD* (Xi’an, China). Organic reagents and solutions were purchased from *Zhiyuan* and *Tianli Co., LTD* (Tianjin, China). All chemicals are of analytical grade and used without further purification.

## 1.2 Synthesis of the CDs

**Table S1**. Raw material ratio for the synthesis of multicolored CDs

|  | **reagent A** | **reagent B** | **reagent C** | **reagent D** | **solvent** |
| --- | --- | --- | --- | --- | --- |
| **purple** | citric acid  / 0.5 g | 3-hydroxy-N, N-diethylaniline  / 0.5 g | o-phenylenediamine  / 0.5 g | polyvinyl pyrrolidone  / 0.1 g | N,N-dimethylformamide  / 20 mL |
| **blue** | citric acid  / 0.5 g | / | o-phenylenediamine  / 0.5 g | polyvinyl pyrrolidone  / 0.1 g | ethylene glycol  / 20 mL |
| **green** | benzoic acid  / 0.5 g | / | o-phenylenediamine  / 0.5 g | polyvinyl pyrrolidone  / 0.1 g | N,N-dimethylformamide  / 20 mL |
| **yellow** | o-Phthalaldehyde  / 0.5 g | / | o-phenylenediamine  / 0.5 g | polyvinyl pyrrolidone  / 0.1 g | N,N-dimethylformamide  / 20 mL |
| **red** | Catechol  / 0.5 g | / | o-phenylenediamine  / 0.5 g | polyvinyl pyrrolidone  / 0.1 g | ethylene glycol  / 20 mL |

Mix the raw materials according to the proportions in the table and add the corresponding solvent. The mixture was then sonicated for 10 min until completely dissolved and was put into a 50 mL polyethylene Teflon-lined autoclave and heated at 160 °C for 8 h. After cooling to room temperature, the solution was centrifuged at 10000 rpm for 5 min, and the supernatant was filtered through a 0.2 mm microporous filter membrane to obtain the filtrate. The filtrate was dialyzed against ultrapure water (1000 Da, molecular weight cutoff) for 24 h to remove unreacted micromolecule reagents. The final product was freeze–dried under vacuum to obtain a solid sample, which is stored in a refrigerator at 0 °C for future use.

## 1.3 Preparation of fluorescent ink

30 mg of p-CDs to r-CDs was weighed into individual beakers, followed by the addition of 3 mL glycerol as a binder and 1.5 mL karaya gum. The resulting mixtures were thoroughly stirred to afford homogeneous violet, blue, green, yellow, and red fluorescent inks.

## 1.4 Making LED.

The r-CDs were mixed with boric acid and dispersed in a dimethylformamide/water solvent system. The mixture was then evaporated in an oven to afford a crystalline solid, which was subsequently ground into a fluorescent powder. The powder was uniformly dispersed in a poly(vinyl alcohol) solution via stirring for 30 min, yielding a stable gel-like liquid. The as-prepared liquid was spin-coated onto a 365 nm UV LED chip and thermally dried at 60 ℃ for 3 h, resulting in an orange-emitting LED.

# 2. Optical properties of the CDs.


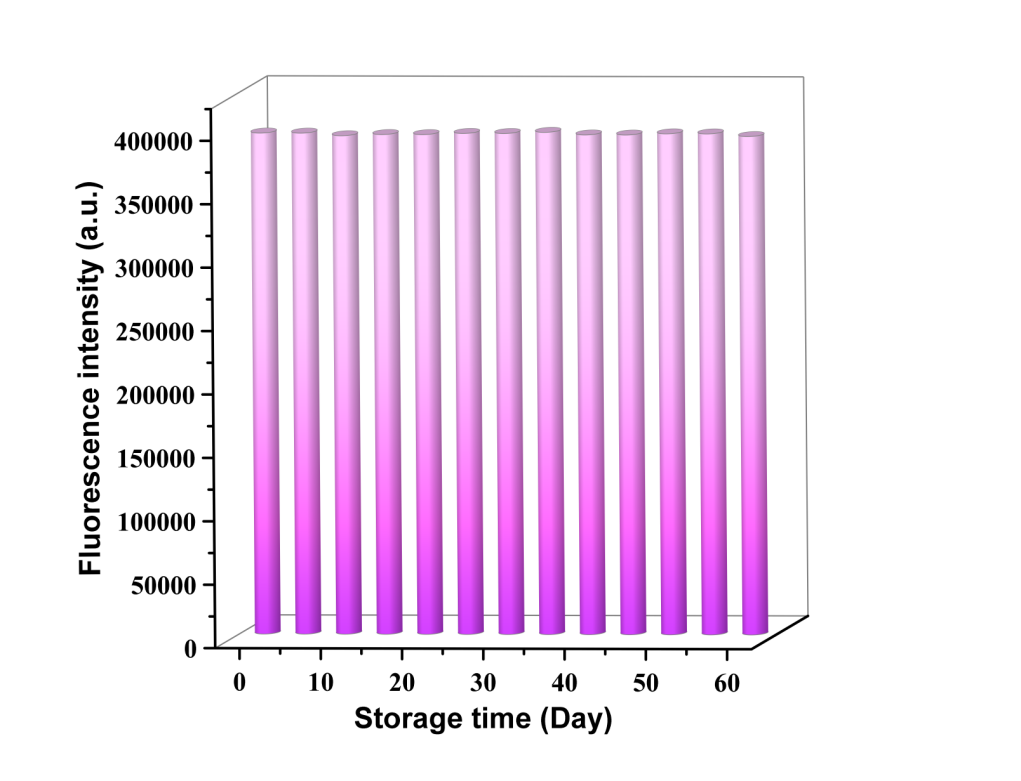


**Figure S1.** Time–stability for the fluorescence intensity of p-CDs solution, λem = 406 nm.


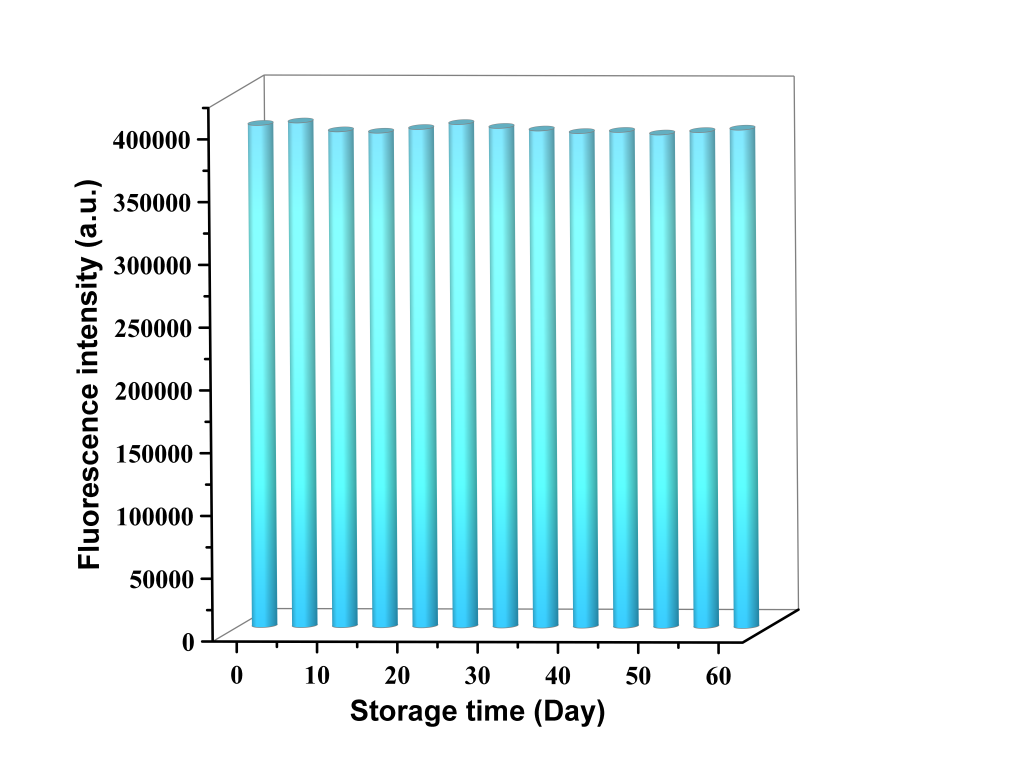


**Figure S2.** Time–stability for the fluorescence intensity of b-CDs solution, λem = 478 nm.


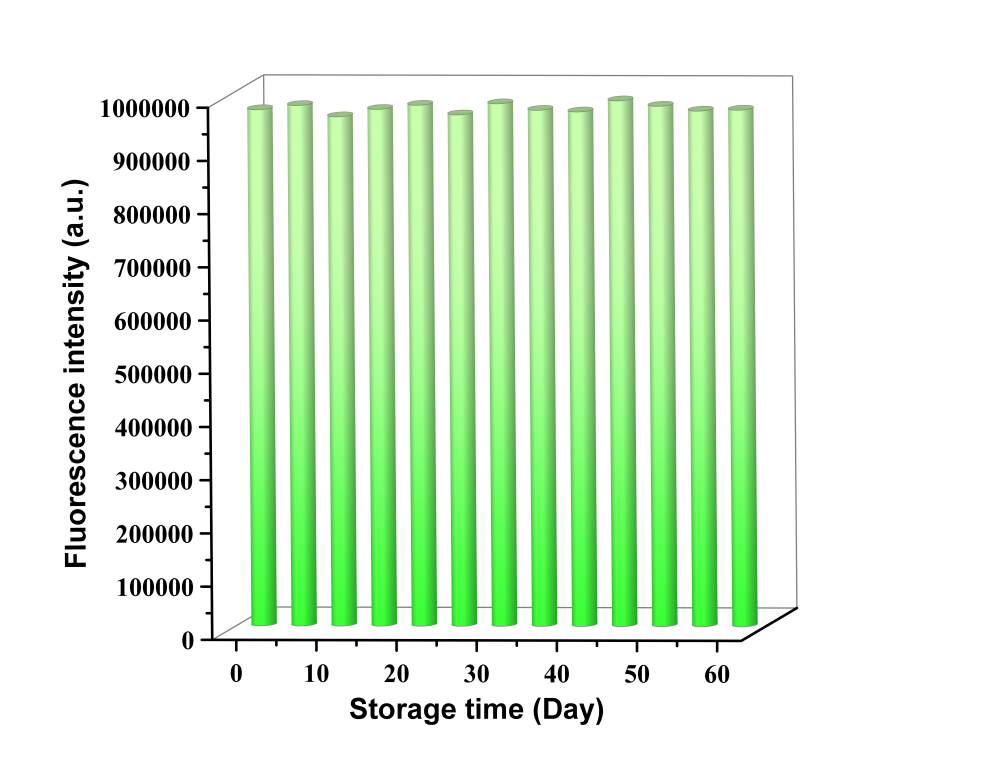


**Figure S3.** Time–stability for the fluorescence intensity of g-CDs solution, λem = 540 nm.


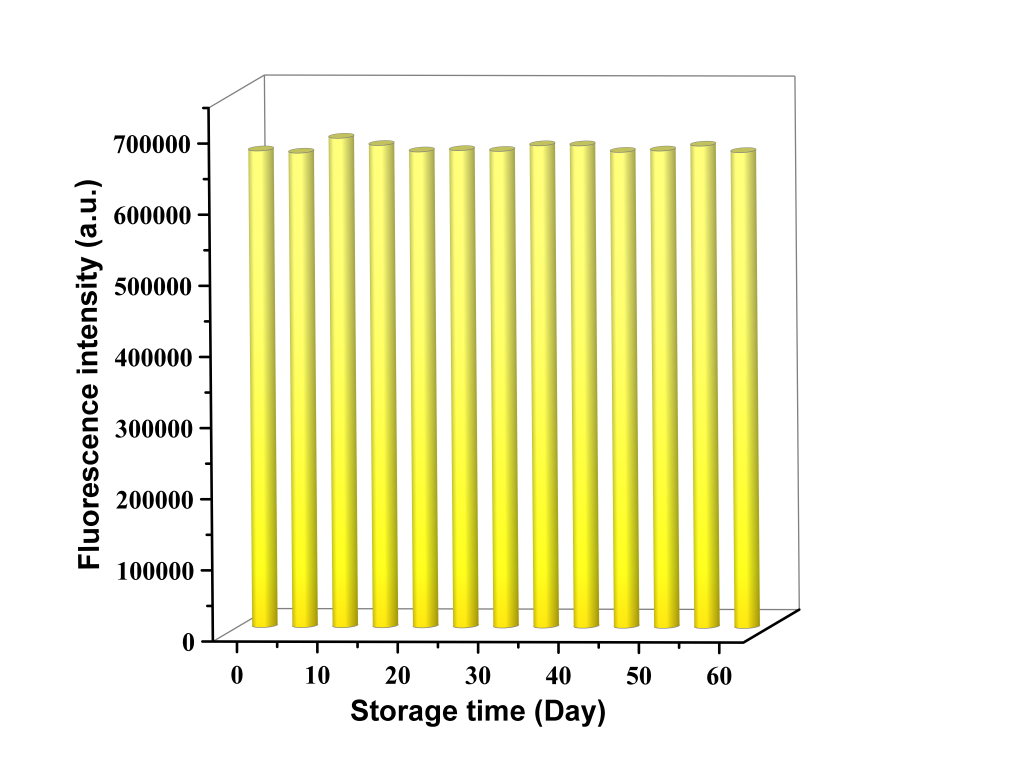


**Figure S4.** Time–stability for the fluorescence intensity of y-CDs solution, λem = 590 nm.


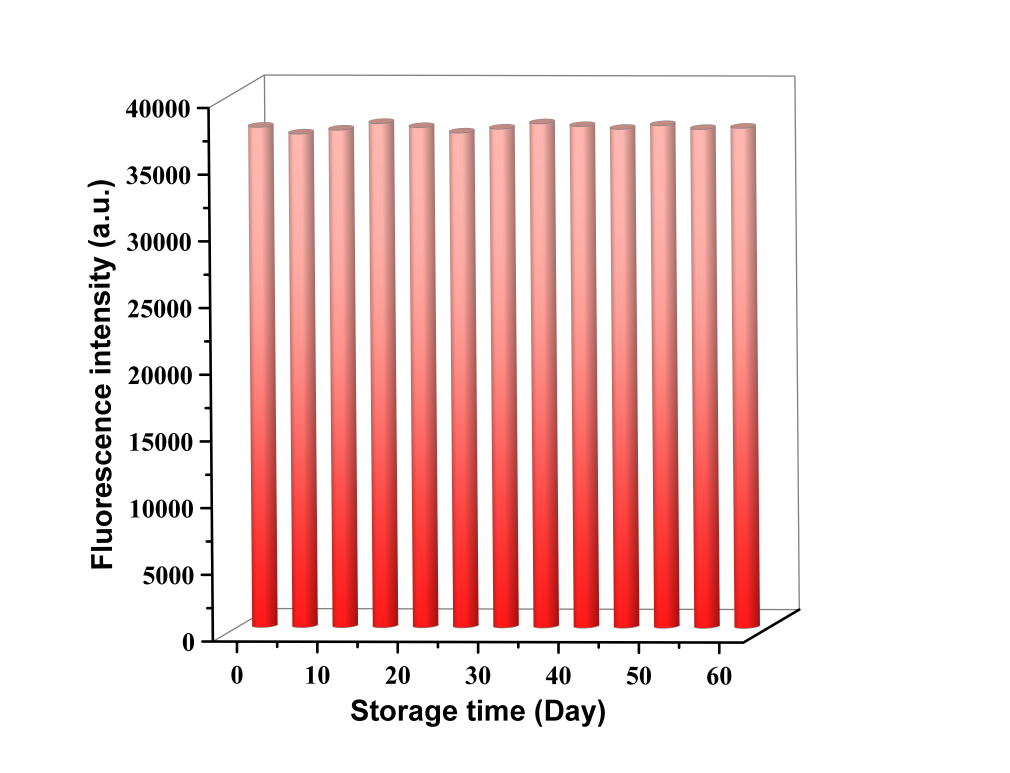


**Figure S5.** Time–stability for the fluorescence intensity of r-CDs solution, λem = 657 nm.


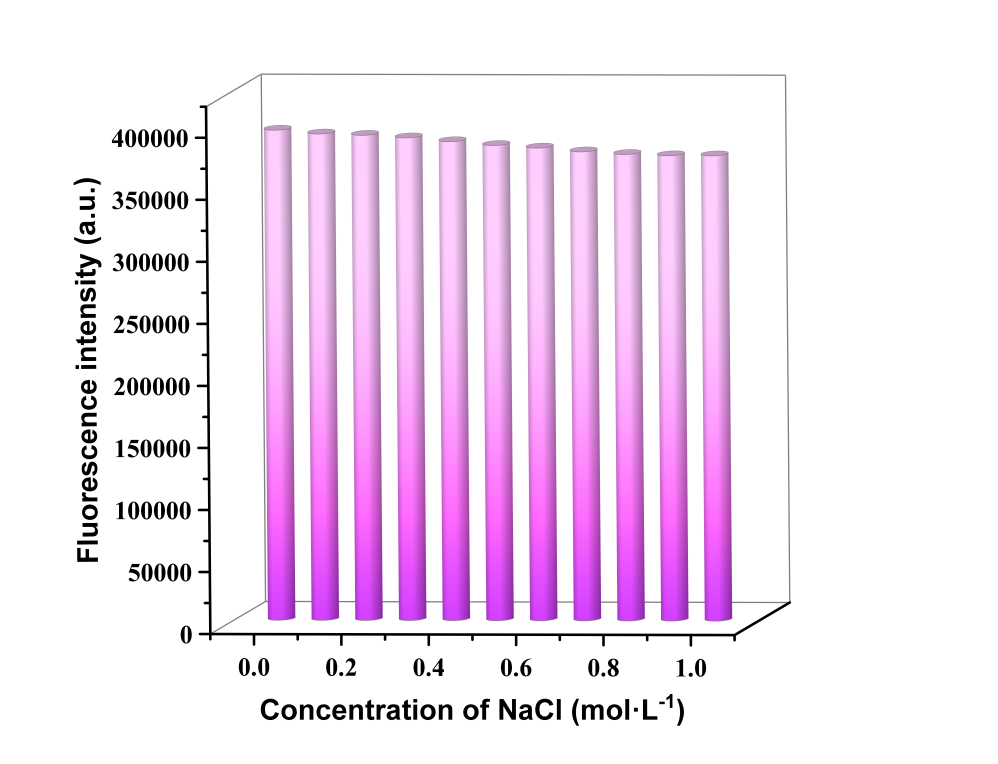


**Figure S6.** Effect of ionic strength of NaCl on fluorescent intensity of the p-CDs, λem = 406 nm.


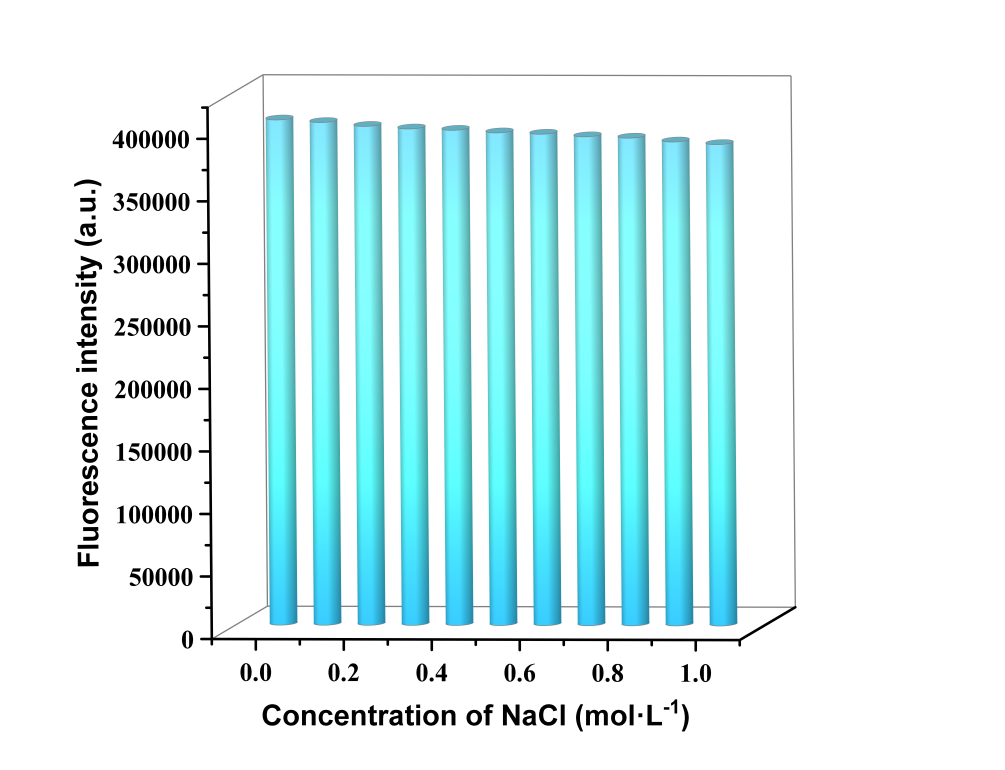


**Figure S7.** Effect of ionic strength of NaCl on fluorescent intensity of the b-CDs, λem = 478 nm.


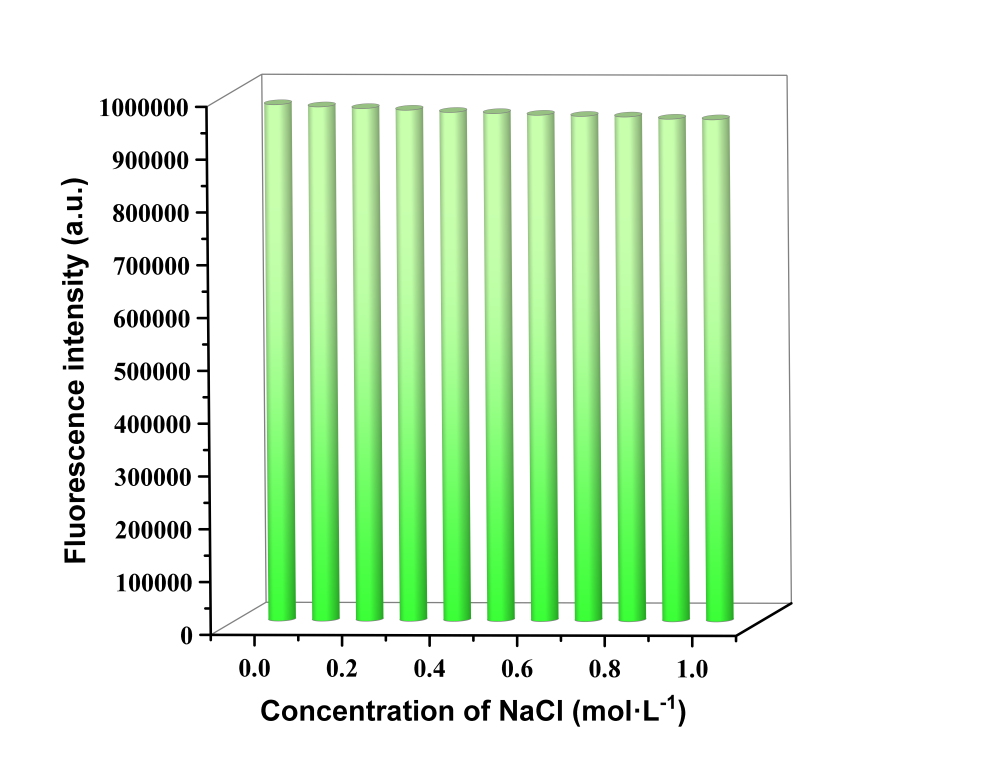


**Figure S8.** Effect of ionic strength of NaCl on fluorescent intensity of the g-CDs, λem = 540 nm.


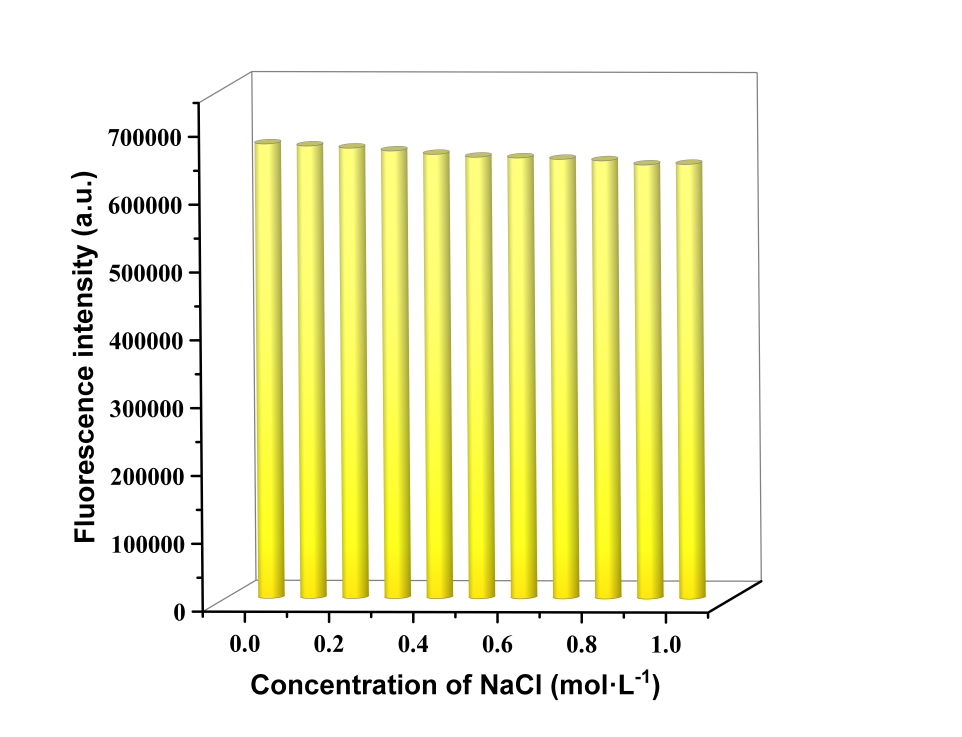


**Figure S9.** Effect of ionic strength of NaCl on fluorescent intensity of the y-CDs, λem = 590 nm.


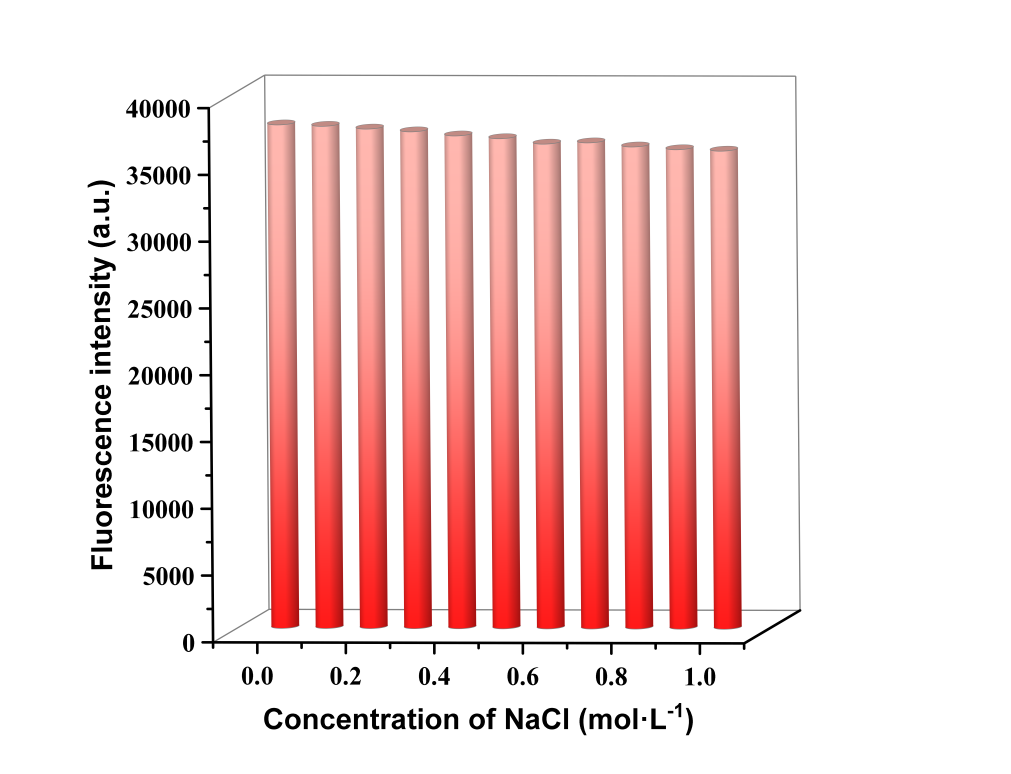


**Figure S10.** Effect of ionic strength of NaCl on fluorescent intensity of the r-CDs, λem = 657 nm.


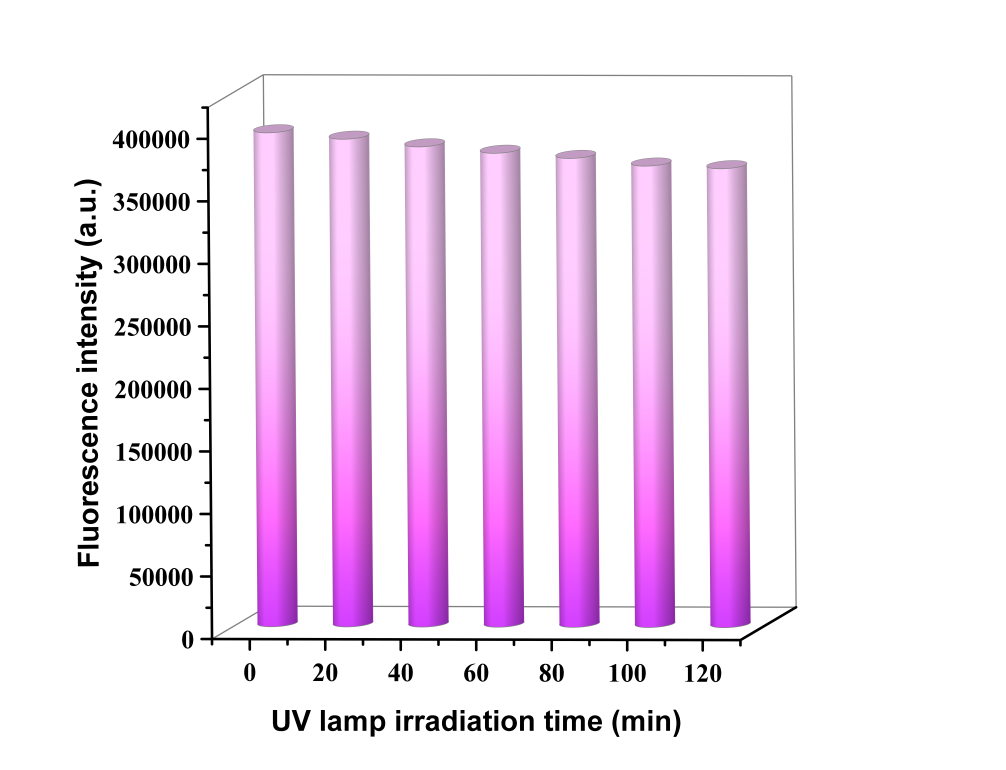


**Figure S11.** Effect of time intervals with UV irradiation at 365 nm on fluorescent intensity of the p-CDs, λem = 406 nm.


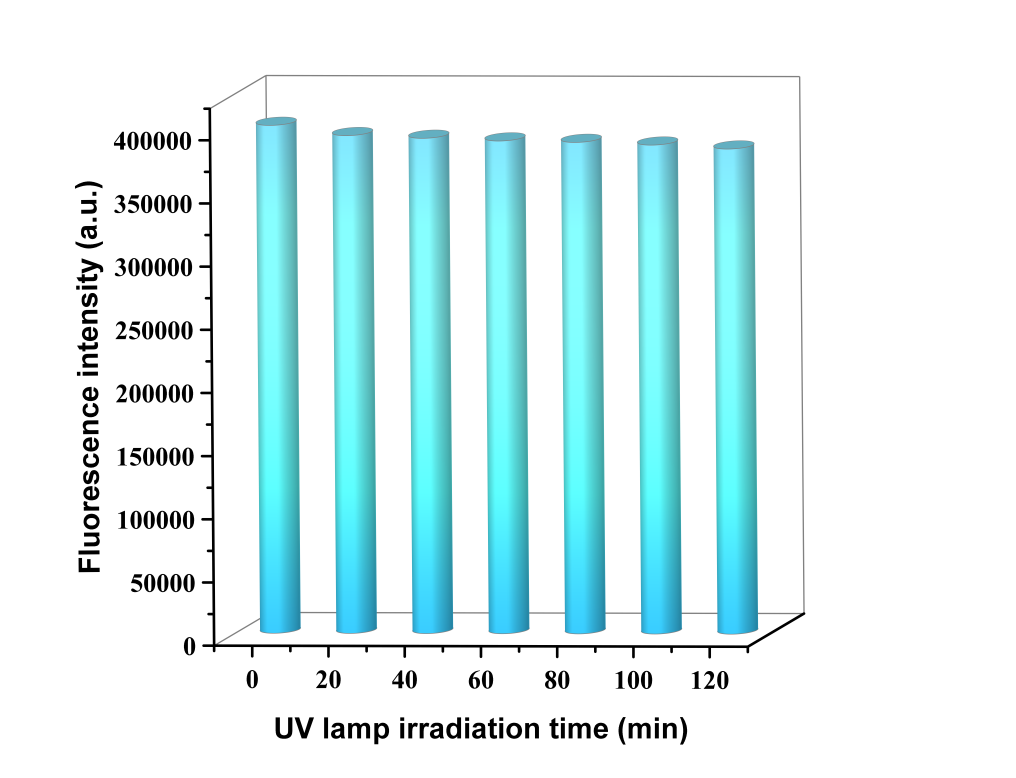


**Figure S12.** Effect of time intervals with UV irradiation at 365 nm on fluorescent intensity of the b-CDs, λem = 478 nm.


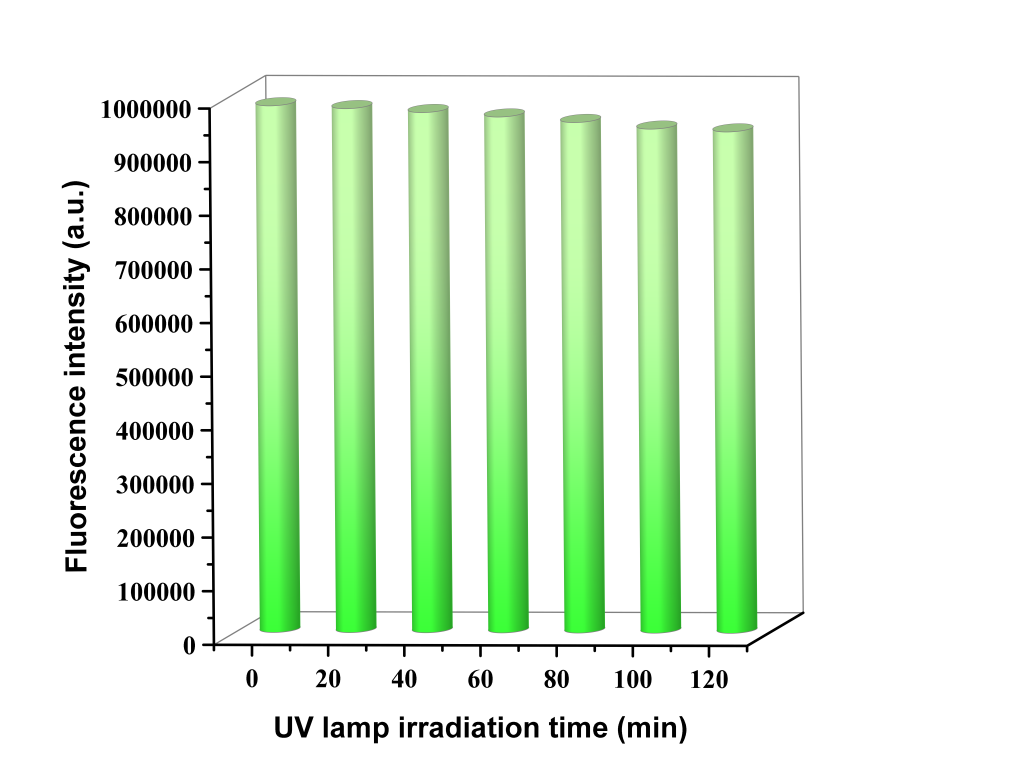


**Figure S13.** Effect of time intervals with UV irradiation at 365 nm on fluorescent intensity of the g-CDs, λem = 540 nm.


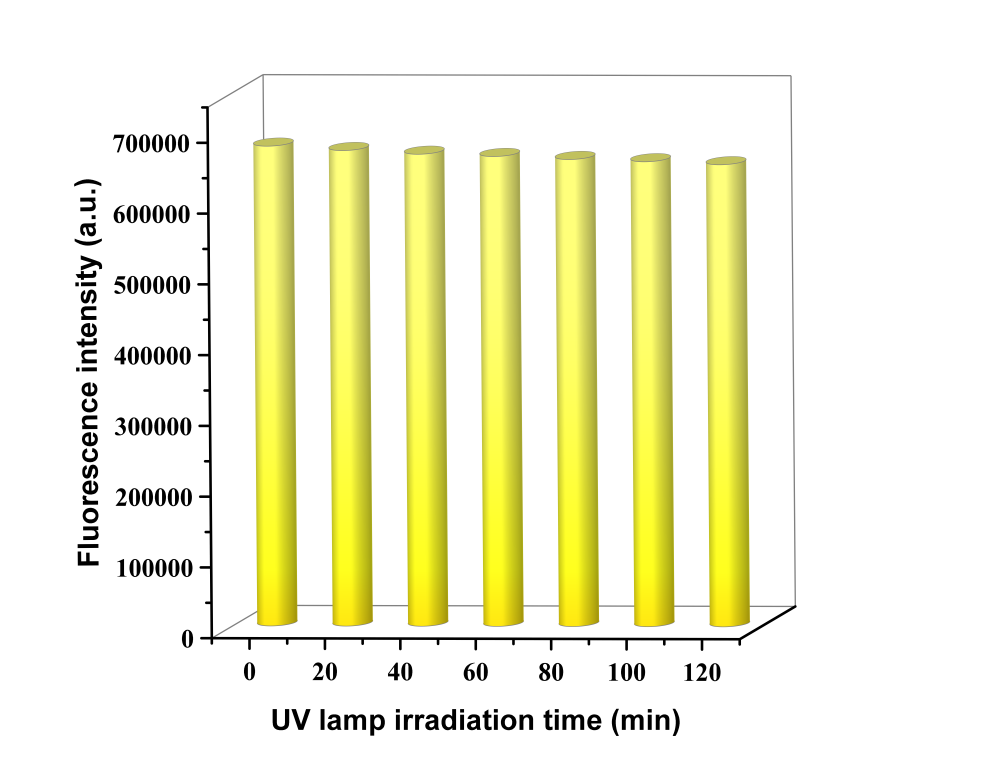


**Figure S14.** Effect of time intervals with UV irradiation at 365 nm on fluorescent intensity of the y-CDs, λem = 590 nm.


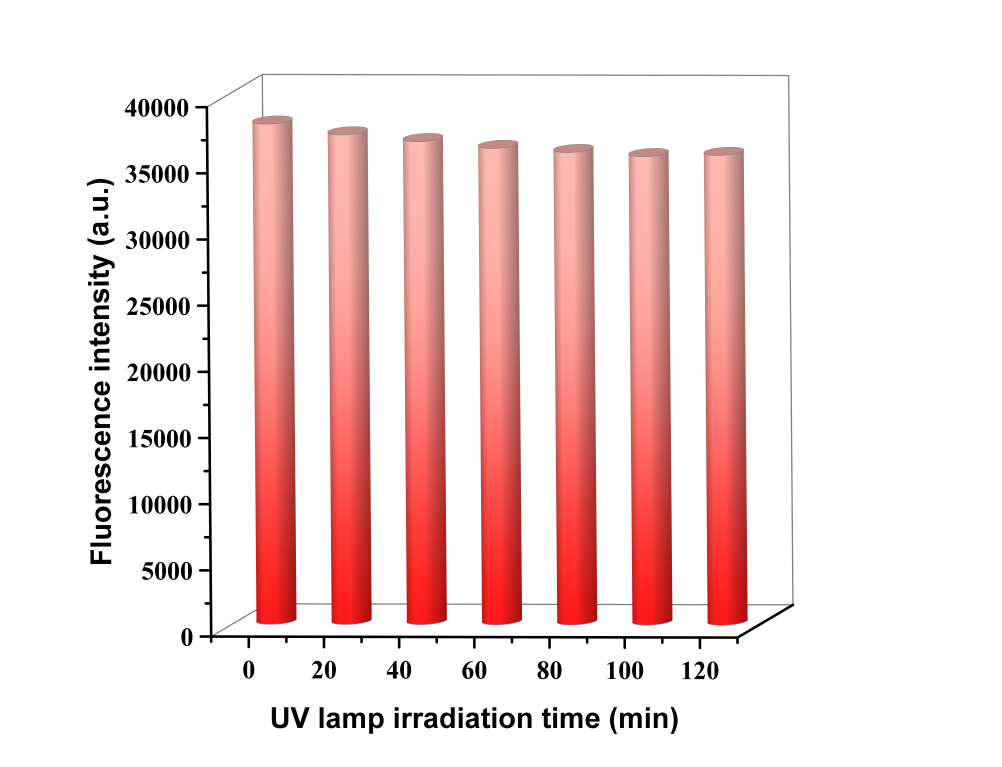


**Figure S15.** Effect of time intervals with UV irradiation at 365 nm on fluorescent intensity of the r-CDs, λem = 657 nm.


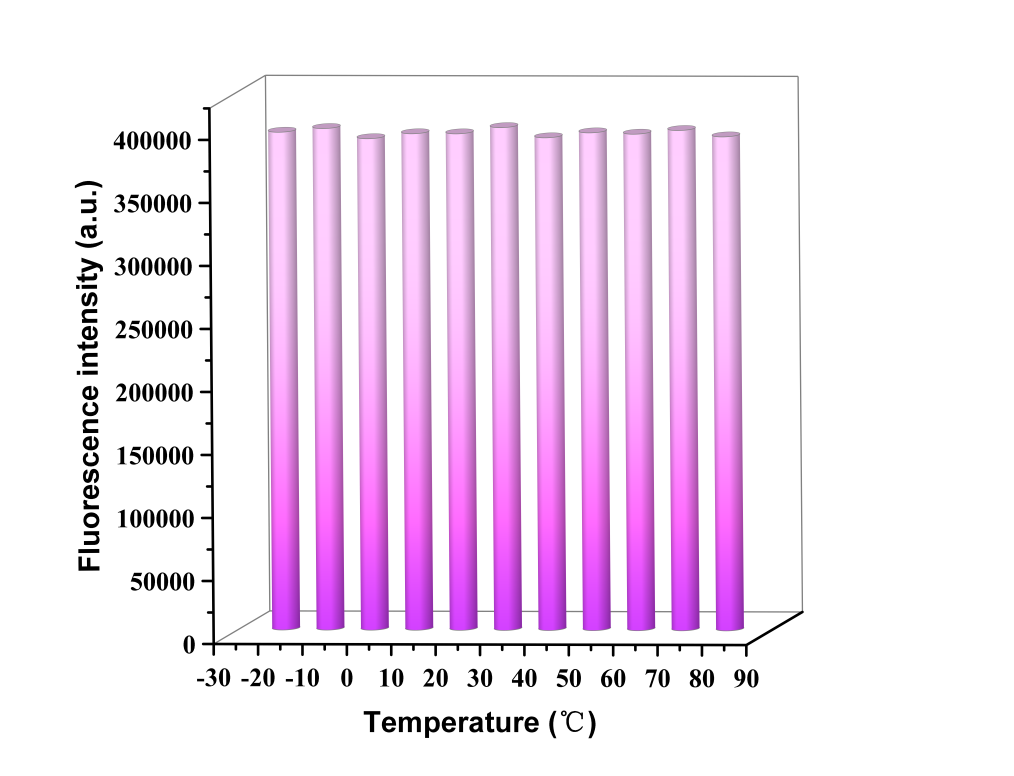


**Figure S16.** The fluorescence stability of the p-CDs in different temperature, λem = 406 nm.


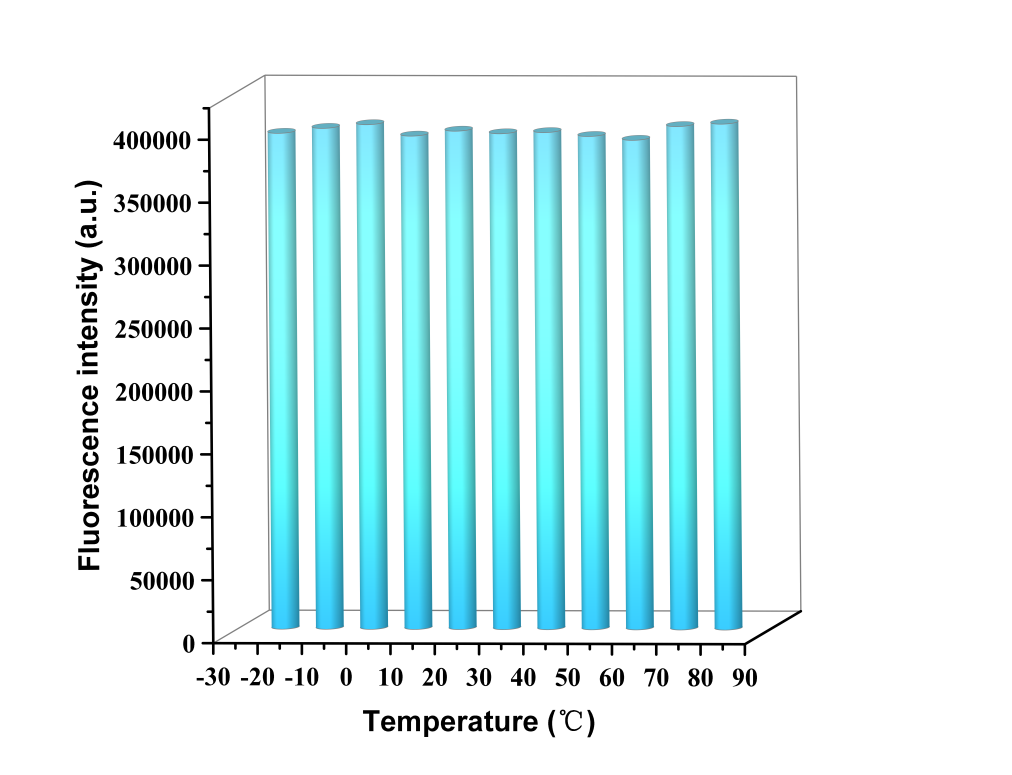


**Figure S17.** The fluorescence stability of the b-CDs in different temperature, λem = 478 nm.


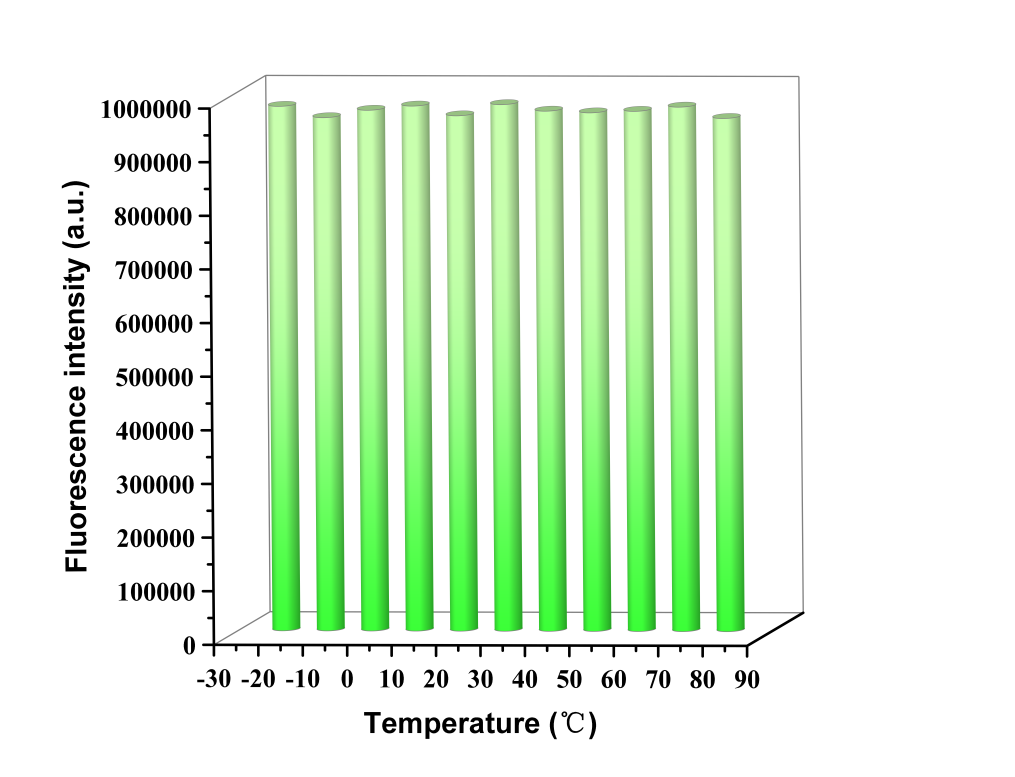


**Figure S18.** The fluorescence stability of the g-CDs in different temperature, λem = 540 nm.


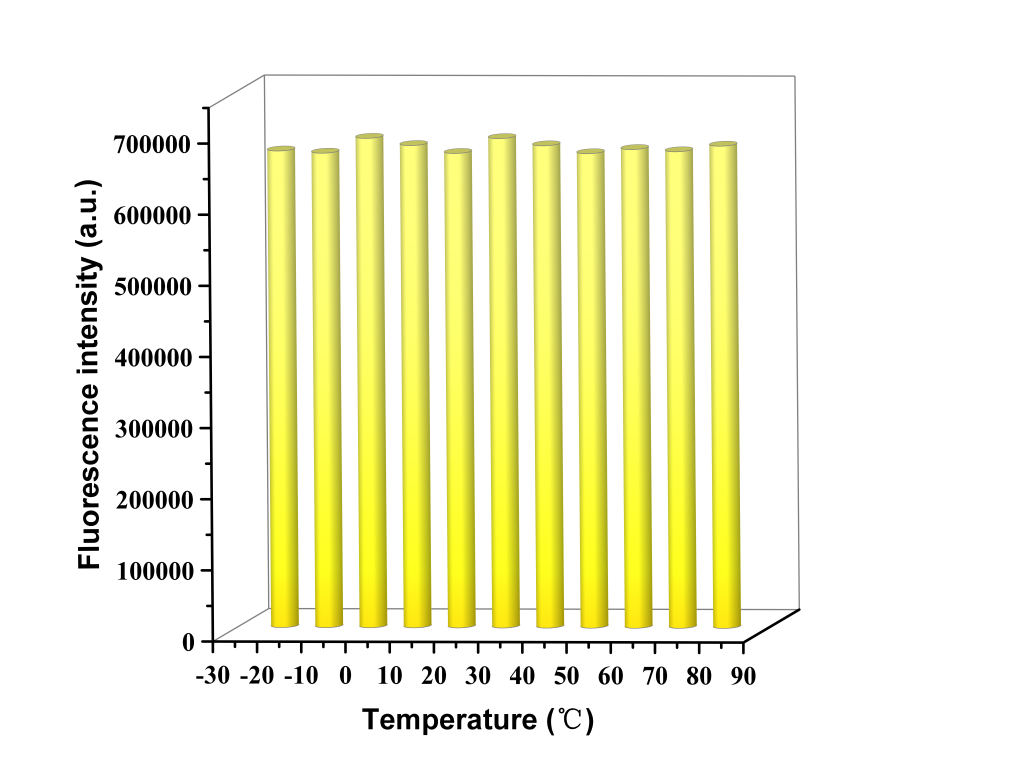


**Figure S19.** The fluorescence stability of the y-CDs in different temperature, λem = 590 nm.


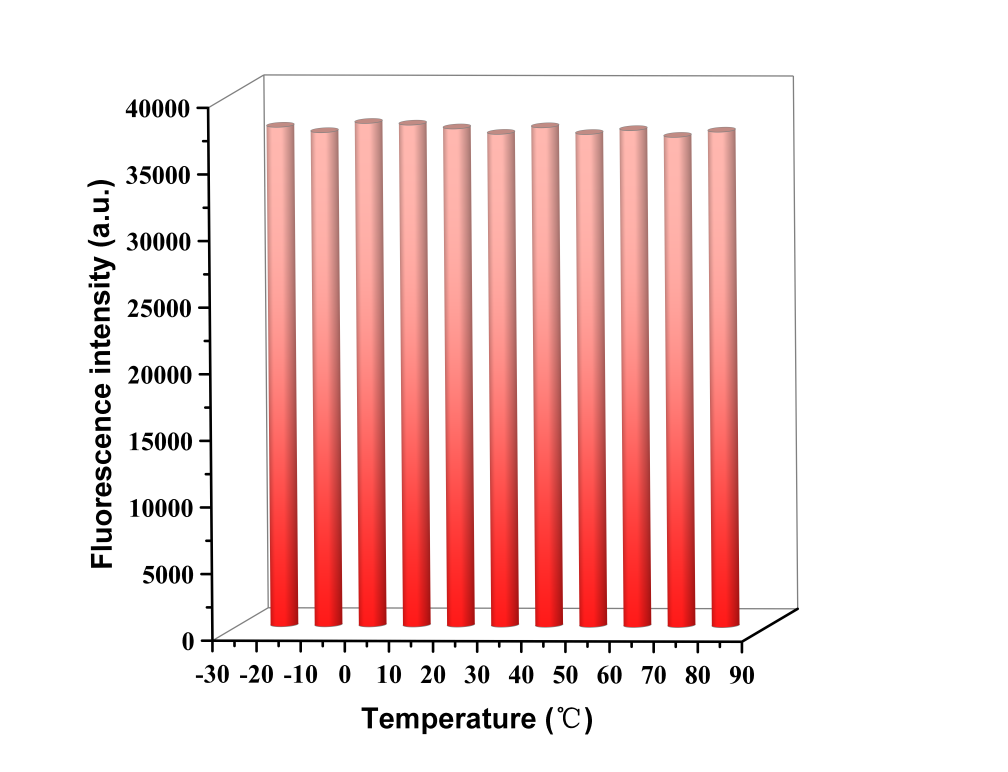


**Figure S20.** The fluorescence stability of the r-CDs in different temperature, λem = 657 nm.


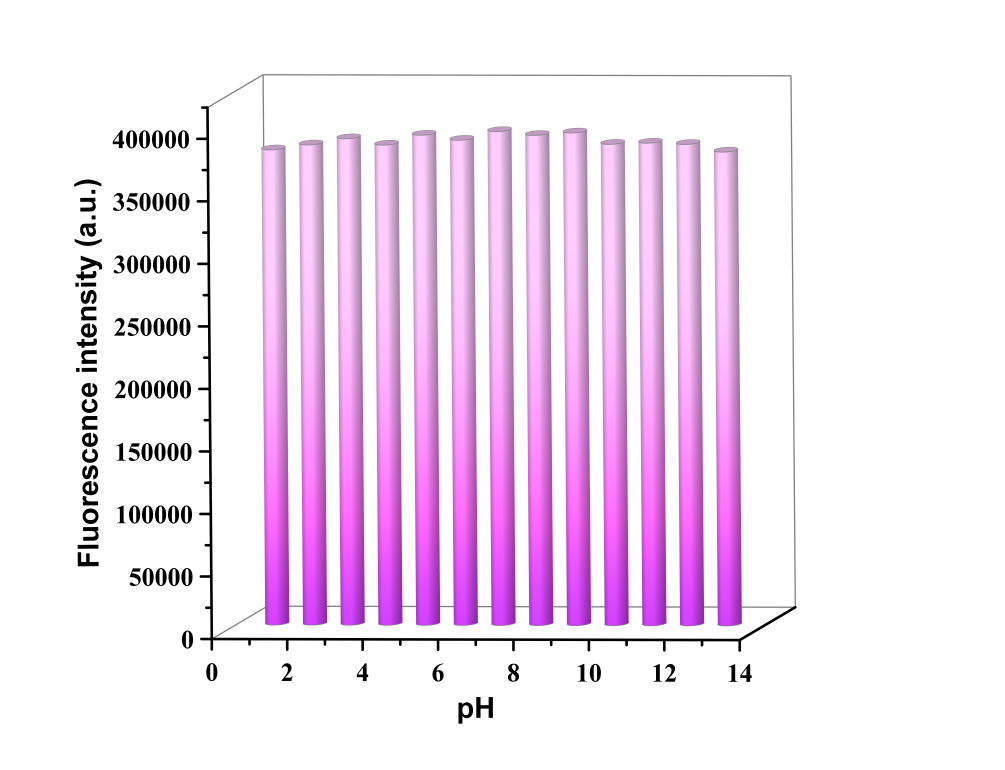


**Figure S21.** Fluorescent intensity of the p-CDs in different pH value, λem = 406 nm.


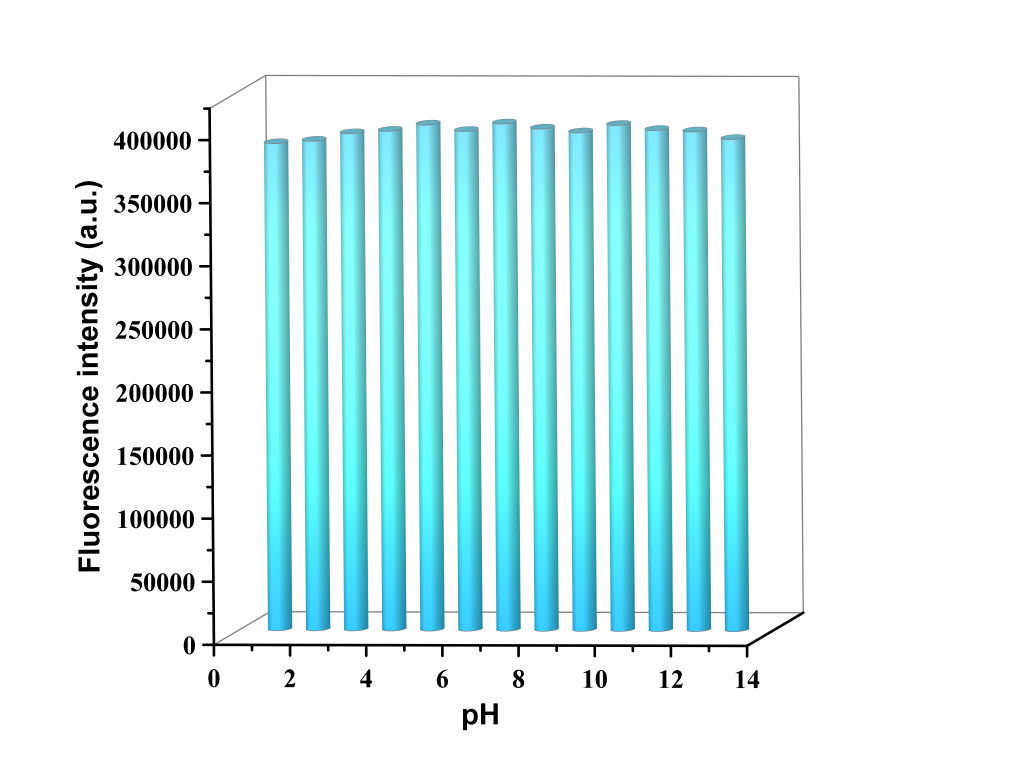


**Figure S22.** Fluorescent intensity of the b-CDs in different pH value, λem = 478 nm.


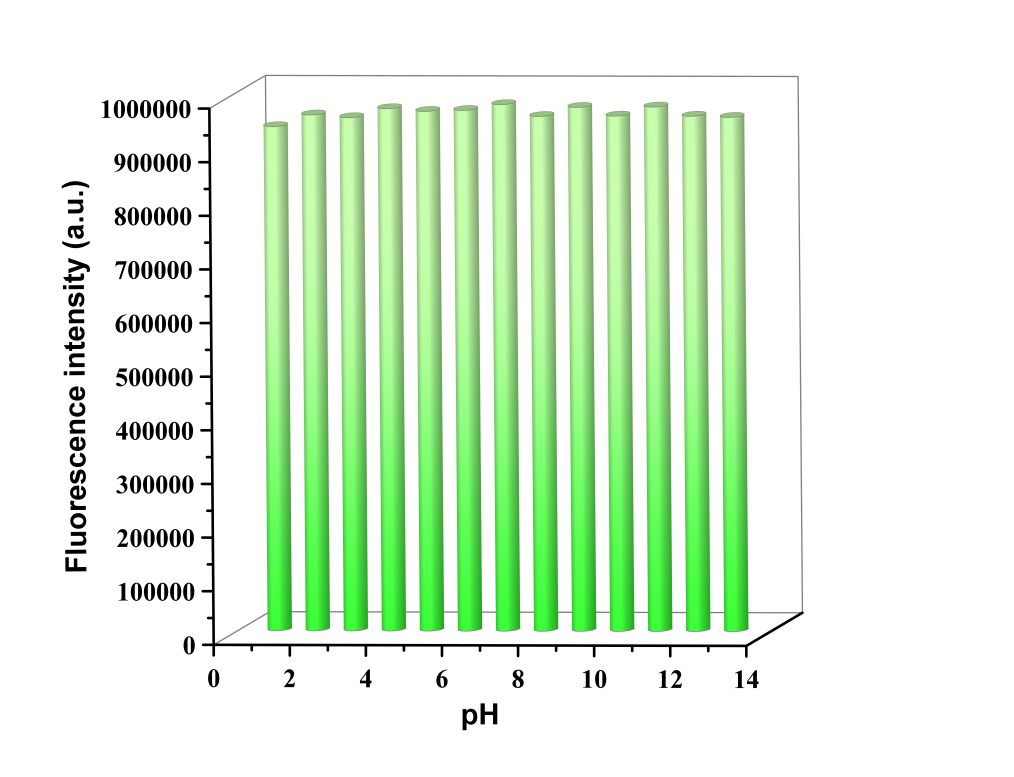


**Figure S23.** Fluorescent intensity of the g-CDs in different pH value, λem = 540 nm.


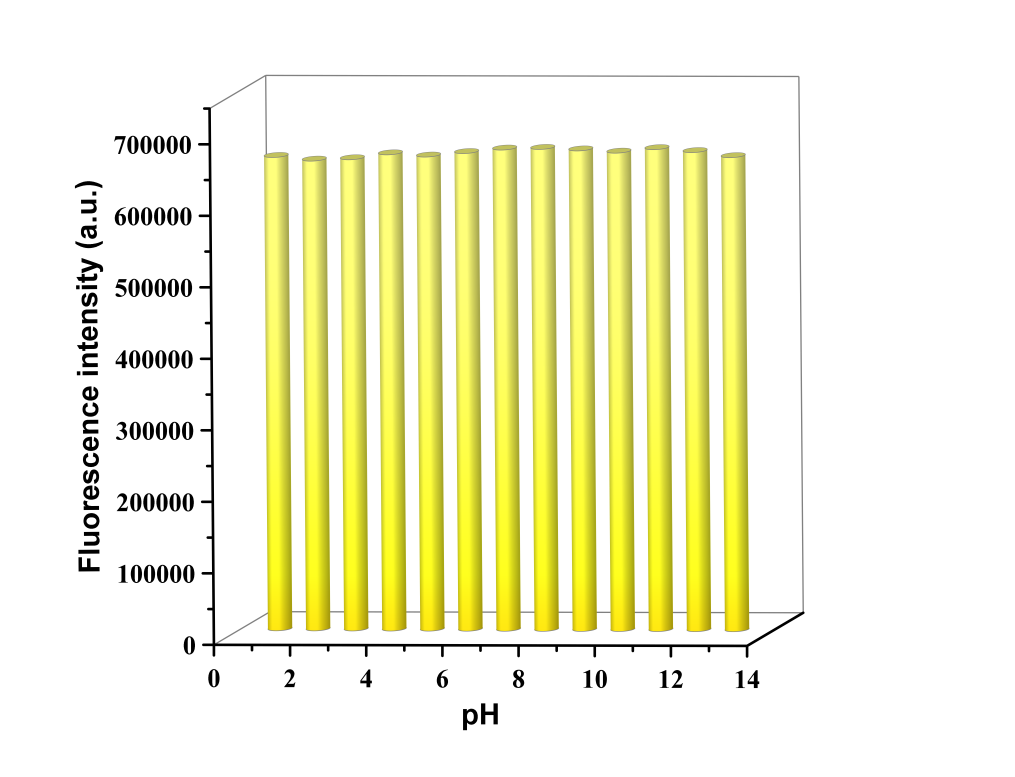


**Figure S24.** Fluorescent intensity of the y-CDs in different pH value, λem = 590 nm.


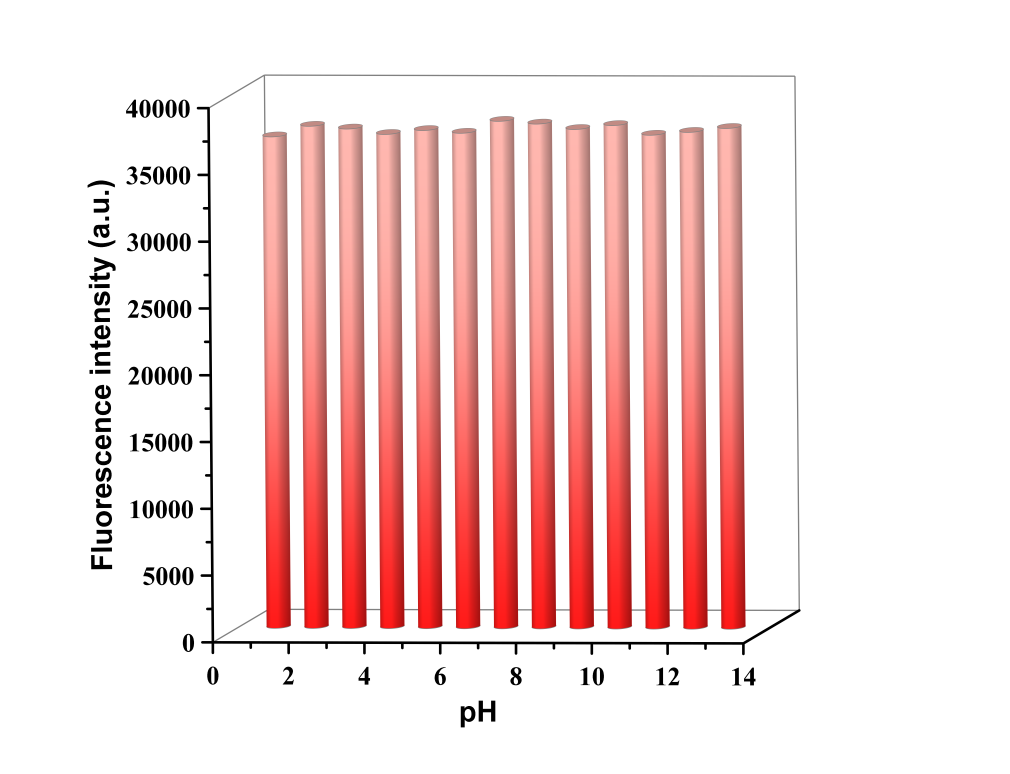


**Figure S25.** Fluorescent intensity of the r-CDs in different pH value, λem = 657 nm.

# 3. Equations

## 3.1 Equations for calculation of fluorescence lifetime

τ=τ1B1 + τ2B2

B1, B2 stand for fractional intensities; τ1, τ2 are decay times.

## 3.2 Equations for calculation of quantum yield

*φ* stands for the fluorescence quantum yield, *F* refers to the integrated fluorescence intensity, and *A* is the absorption values. The subscript “*R*” and “*S*” correspond to the reference and the sample.
